1 **Residential clustering of COVID-19 cases and efficiency of building-wide compulsory**  
2 **testing notices as a transmission control measure in Hong Kong**

3

4 Benjamin R. Young<sup>1</sup>, Bingyi Yang<sup>1</sup>, Peng Wu<sup>1,2</sup>, Dillon C. Adam<sup>1,2</sup>, Jessica Y. Wong<sup>1</sup>, Faith  
5 Ho<sup>1</sup>, Huizhi Gao<sup>1</sup>, Eric H. Y. Lau<sup>1,2</sup>, Gabriel M. Leung<sup>1,2</sup>, Benjamin J. Cowling<sup>1,2</sup>

6

7 **Affiliations:**

8 1. World Health Organization Collaborating Centre for Infectious Disease Epidemiology and  
9 Control, School of Public Health, LKS Faculty of Medicine, The University of Hong Kong,  
10 Hong Kong Special Administrative Region, China

11 2. Laboratory of Data Discovery for Health, Hong Kong Science and Technology Park, New  
12 Territories, Hong Kong Special Administrative Region, China

13

14 **Corresponding author:**

15 Peng Wu, School of Public Health, Li Ka Shing Faculty of Medicine, The University of  
16 Hong Kong, 7 Sassoon Road, Pokfulam, Hong Kong

17 Tel: +852 3917 6746; Email: [pengwu@hku.hk](mailto:pengwu@hku.hk)

18

19 Running head: Residential clustering of COVID-19

20 Word count (abstract): 223

21 Word count (main text): 3,367

22 **ABSTRACT**

23 **Background:** Despite relatively few reports of residential case clusters of COVID-19,  
24 building-wide compulsory testing notices on residential apartment blocks are frequently  
25 applied in Hong Kong with the aim of identifying cases and reducing transmission.

26 **Methods:** We aimed to describe the frequency of residential case clusters and the efficiency  
27 of compulsory testing notices in identifying cases. The residences of locally infected COVID-  
28 19 cases in Hong Kong were grouped to quantify the number of cases per residence.  
29 Buildings targeted in compulsory testing notices were matched with the residence of cases to  
30 estimate the number of cases identified.

31 **Results:** We found that most of the residential buildings (4246/7688, 55.2%) with a  
32 confirmed COVID-19 case had only one reported case. In the fourth and the fifth epidemic  
33 wave in Hong Kong, we estimated that compulsory testing notices detected 29 cases (95%  
34 confidence interval: 26, 32) and 46 cases (44, 48) from every 100 buildings tested (each with  
35 hundreds of residents), respectively. Approximately 13% of the daily reported cases were  
36 identified through compulsory testing notices.

37 **Conclusions:** Compulsory testing notices can be an essential method when attempting to  
38 maintain local elimination ('zero covid') and most impactful early in an epidemic when the  
39 benefit remains of stemming a new wave. Compulsory testing therefore appears to be a  
40 relatively inefficient control measure in response to sustained community transmission in the  
41 community.

42

43 **Keywords:** COVID-19, SARS-CoV-2, infection control, case clusters, transmission  
44 dynamics, high-rise buildings

45

46 **INTRODUCTION**

47 Hong Kong as other large cities in the world has a high population density and many  
48 residents live in high-rise apartment buildings where the median gross area is 430 square feet  
49 (40 square meters), with an average of 2.8 residents per household (1). The severe acute  
50 respiratory syndrome coronavirus 2 (SARS-CoV-2) has been hypothesized to transmit on  
51 some occasions within high-rise apartments vertically through the sewage stack (2),  
52 horizontally along corridors (3) as well as via outdoor routes through open windows and  
53 vents (4). While more than a third of documented transmission events occurred within  
54 households during the first nine months of the pandemic (5), there have been few large  
55 outbreaks involving multiple households in residential estates (2). This is in contrast to the  
56 2003 outbreak of Severe Acute Respiratory Syndrome (SARS) when more than 300 of 1755  
57 cases in Hong Kong occurred in 200 households in a large outbreak in six blocks of the  
58 Amoy Gardens housing estate, with infection potentially spread through the air via sewage  
59 drainage pipes (4, 6).

60

61 Hong Kong has experienced five epidemic waves over the course of the pandemic to date.  
62 The first four waves were caused by the ancestral SARS-CoV-2 strain and were controlled  
63 through a combination of public health and social measures (7), leading to 13,000 confirmed  
64 cases documented, and less than 1% of the population infected as indicated in a serologic  
65 study (8) . However, a large fifth wave occurred in early 2022 with Omicron BA.2 and more  
66 recently Omicron BA.5 and BA.4, causing more than a million confirmed cases and more  
67 than 9000 deaths (9). While stringent public health and social measures have been  
68 implemented in the fifth wave, the suppressed epidemic wave never dies out.

69

70 One control measure implemented in Hong Kong since November 2020 is the issuance of  
71 compulsory testing notices (CTNs) on residential buildings when one or more cases are  
72 identified among the residents of that building or when SARS-CoV-2 virus is identified in  
73 sewage samples collected from that building. When a CTN is issued on a particular building,  
74 all residents of that building are required to provide respiratory specimens (or stool  
75 specimens for children <3y) at community testing centres on specified dates (wave 4: within  
76 three days, wave 5: within two days and repeated on multiple dates). Starting in early 2021, a  
77 more stringent approach was used when a higher risk of residential transmission was  
78 suspected, some buildings would be issued a CTN and placed under a ‘restriction-testing  
79 declaration’ (RTD) as well, locking the building down for a period of time (usually for  
80 around 12 hours overnight) to allow all residents to be sampled for RT-qPCR test  
81 immediately, with residents not permitted to leave the building until all test results are  
82 obtained. The longest RTD occurred in a building for an 8-day lockdown in early 2022 at the  
83 start of the fifth wave (10). On a small number of occasions, all residents of a building with  
84 confirmed cases were required to undergo weeks of quarantine at designated facilities (11).  
85 The objective of this study is to investigate the extent of residential case clustering  
86 throughout the pandemic and the efficiency of building-wide CTNs and RTDs in the control  
87 of COVID-19 in Hong Kong.

88

## 89 **1. MATERIAL and METHODS**

### 90 ***1.1 Study period and population***

91 We analyzed information on CTNs, RTDs, and individuals with laboratory-confirmed SARS-  
92 CoV-2 infection who lived in residential buildings, excluding institutions such as residential  
93 care homes. We excluded laboratory-confirmed cases that were classified as having been  
94 infected outside Hong Kong (“imported cases”). Our study period covered all local epidemics

95 that occurred from early 2020 through to 15 February 2022. After the latter date, the rapid  
96 increases in number of daily cases precluded detailed information being reported on every  
97 case. We analyzed data on CTNs and RTDs after the implementation of these initiation of  
98 these policies i.e., after November 2020 for CTNs and after January 2021 for RTDs.

99

## 100 **1.2 Data collection**

101 Information on each eligible case was collected from a line list of COVID-19 cases including  
102 the report date, date of symptom onset, residential building address, virus variant causing  
103 infection and any known associated clusters. To analyse the variants of SARS-CoV-2, cases  
104 were grouped into four categories, the ancestral strain, Delta or Omicron variants of concern,  
105 or other/undetermined variants, dependent on the report date and any viral mutations  
106 sequenced. Cases identified in the first four waves were considered infections with the  
107 ancestral strain (12), infections in the fifth wave with a N501Y gene mutation in the virus  
108 RNA were determined to be the Delta variant and those with N501Y and T478K gene  
109 mutations were the Omicron variant. Cases identified after 6 February 2022 without  
110 sequencing data were assumed to be infected by the Omicron variant as it was the  
111 predominant variant by this time (7).

112

## 113 **1.3 Cases and clusters per building**

114 For each case, the residential address details were extracted and building addresses geocoded  
115 with the respective building geocoordinates. The number of cases and clusters per residential  
116 building were estimated using an algorithm developed to group the cases by unique  
117 residential building based on a combination of geocoordinates and address details (see  
118 appendix, residential grouping algorithm). We defined a case cluster as two or more  
119 epidemiologically linked cases.

120

#### 121 ***1.4 Compulsory testing notices***

122 From detailed CHP press releases we identified and geocoded the residential buildings  
123 targeted by CTNs during the study periods. For each CTN, we collected the justification and  
124 the initiation and closure dates of CTNs including the date(s) of mandatory testing. With  
125 regards to RTDs specifically, data on the total number of residents that underwent a COVID-  
126 19 test and the number of cases identified within the RTD were also collected.

127

128 To determine the number of reported cases associated with CTNs, the reported cases were  
129 matched with the targeted buildings using coordinates, address details, CTN issuance and  
130 mandatory test dates and case report dates. Cases matched with buildings in RTDs were  
131 limited to those reported on the day the lockdown was lifted as lockdowns would not be lifted  
132 until the COVID-19 test results were available for all residents. If the lockdown was extended  
133 for multiple days, cases reported during and up to one day after the lockdown were  
134 considered associated with the RTD. Cases identified from buildings receiving CTNs due to  
135 ‘confirmed case(s) in the building’ or ‘positive sewage samples’ were those reported one day  
136 after the initiation of CTN up to one day following the last date of mandatory testing. If a  
137 building had multiple CTNs open at once, the proximity of the case report date to the  
138 mandatory testing date would determine which CTN accounted for the case. If the mandatory  
139 tests shared the same date, the earlier CTN issued accounted for any cases identified during  
140 that period.

141

142 Cases matched with a CTN were further classified to distinguish those which could have  
143 been identified via contact-tracing alone versus cases that were determined likely to have  
144 only been identified via the CTN and therefore we considered “untraceable” (see appendix,

145 ‘untraceable’ cases algorithm). The proportion of asymptomatic CTN-associated cases were  
146 also determined using the reported symptom onset data.

147

### 148 *1.5 Statistical analysis*

149 The daily number of CTN-associated cases aggregated on the mandated test date was divided  
150 by the daily number of local cases on the same date to calculate the proportion daily cases  
151 associated with CTNs, and the average daily proportion was weighted by the daily local  
152 cases. The RTD-test positivity per 100 residents tested was calculated by dividing the  
153 reported number of PCR-confirmed cases detected in RTDs by the reported number of  
154 residents tested and multiplying 100. To determine the daily RTD test-positivity, cases  
155 associated with a multi-day RTD were distributed amongst the days over the RTD following  
156 a normal distribution with a standard deviation of two, while the number of residents tested in  
157 the RTD was distributed evenly over the testing period. The ratios of CTN-associated cases  
158 and untraceable cases per 100 buildings targeted in CTNs and per 100 building-wide  
159 mandated tests were calculated and stratified by epidemic wave. The 95% confidence  
160 intervals for the ratios were calculated using the Clopper-Pearson Exact method. The  
161 cumulative proportion of CTN-associated cases coded as ‘untraceable’ was calculated by the  
162 sum of ‘untraceable’ cases divided by the CTN-associated cases within the period of interest.  
163 An ordinal logistic regression model was fit to determine whether there was a difference in  
164 odds of a higher number of cases (6-20, >20 cases) or clusters (2-5, >5 clusters) per building  
165 associated with the infecting variant compared with a lower number of cases (1-5 cases) and  
166 clusters (<2 clusters) per building.

167

168 As a sensitivity analysis, the residential grouping algorithm was checked by randomly  
169 sampling 100 buildings (50 from waves one to four and 50 from wave five) with reported

170 cases and manually assessing all cases associated with each respective building. The  
171 sensitivity and specificity of the reported case and CTN matching algorithm were assessed by  
172 randomly sampled 100 matched and 50 non-matched cases, to manually check whether they  
173 were true matches or true non-matches, respectively, based on our pre-defined criteria.  
174 Pearson-correlation coefficients were used to assess the relationship between the daily  
175 number of local cases and the SARS-CoV-2 test-positivity in RTDs. Similar methods were  
176 used to examine the relationship between the daily number of local cases and the number of  
177 buildings targeted in CTNs.

178

## 179 **2. RESULTS**

180 As of 15 February 2022, there had been 26,670 laboratory-confirmed COVID-19 cases in  
181 Hong Kong, which included 22,782 (85.4%) locally infected and 3888 (14.6%) imported  
182 cases. Among the local infections 9,382 occurred between Hong Kong's first (22 January  
183 2020) and fourth wave (up to 25 April 2021), while 13,323 occurred during the rising phase  
184 of the fifth wave (24 December 2021 – 15 February 2022) (Figure 1A).

185

186 The first RTD was issued in January 2021 during the fourth wave. Forty RTDs occurred  
187 during the fourth wave targeted 305 residential buildings and 36,006 residents, with a mean  
188 test positivity of 0.04% (Figure 1B-D). The largest RTD in the fourth wave was on 23  
189 January and lasted 40 hours (median duration of lockdowns: 14 hours) with over 3,000 staff  
190 members involved to test around 7,000 individuals. Within the first six weeks of the fifth  
191 wave, ninety-two RTDs were issued on 171 residential buildings and 98,603 individuals,  
192 resulting in 561 cases and a mean test positivity of 0.35% (variance = 0.82%) (Figure 1B-D).  
193 Between 19 January 2022 and 29 January 2022, six RTDs were issued across seven different  
194 buildings at the Kwai Chung Estate, with extended lockdowns and repeated testing. Over the



195 ten-day period around 35,000 COVID-19 PCR tests were administered, impacting an  
196 estimated 12,000 residents, which were linked with at least 216 reported cases.

197

198 Figure 2A shows the relationship between the daily RTD test positivity rate (cases detected  
199 per 100 residents tested) and the daily number of local cases. The statistically significant (p-  
200 value <0.001) correlation coefficient moves closer to 1, from 0.59 to 0.76, if the large  
201 residential outbreak at the Kwai Chung Estate is removed (Figure 2A). However, cases linked  
202 to RTDs comprised just 4.0% (95% CI: 1.2%, 6.8%, weighted by daily local cases) of all  
203 cases confirmed each day and there was no statistically significant correlation between the  
204 two metrics (p=0.757) (Figure 2C).

205

206 During the fourth wave 1057 CTNs were issued to 1321 residential buildings, and 345 cases  
207 associated with the CTNs were identified over a four-month period. In the first six weeks of  
208 the fifth wave, 4174 building-wide tests were mandated via CTNs across 1097 residential  
209 buildings and led to 1888 associated reported cases (Figure 1E-F). The justifications for  
210 issuing CTNs are displayed in Table 1, and CTNs triggered by other than the pre-determined  
211 reasons were excluded from our analyses (Table S1 & S2).

212

213 The proportions of CTN-associated ‘untraceable’ Delta and Omicron cases from the tested  
214 residential buildings doubled that of the ancestral strain (Table 1). Once the daily total of  
215 confirmed cases initially surpassed 100 cases per day in the fifth wave the cumulative  
216 proportion of CTN-associated untraceable cases rose from 44% (32/72) to 68% (120/126)  
217 and remained high as the daily number of reported cases increased. The total number of  
218 CTN-associated cases detected per 100 building-wide mandated tests was higher (p<0.001) in  
219 the fifth wave compared to the fourth wave Table 1. Over 300-400 CTN-associated cases

220 were detected from every 100 building-wide mandated tests conducted when daily building-  
221 wide tests and local cases remained low, and the number of CTN associated cases remained  
222 below 100 although the daily number of building-wide tests and local cases reached as high  
223 as 400 tests and 2000 cases per day, respectively (Figure 2B). Despite the significantly higher  
224 overall detection ratio of CTN-associated cases to building-wide tests in the fifth wave, a  
225 similar daily median detection ratio of CTN-associated cases was observed between the  
226 fourth (22; interquartile range: 0, 42) and fifth wave (22; 0, 58). Cases linked to residential  
227 CTNs on average comprised 12.9% (95% CI: 10.2, 14.8 weighted by daily case numbers) of  
228 daily local cases reported during the same time period (Figure 2D).

229

230 Up to the fourth wave, we identified residential addresses for 8066/9382 (86.0%) locally  
231 infected cases who resided across 3690 different buildings. During the fifth wave 8208/12900  
232 (63.6%) reported Omicron cases had information on 3931 residential buildings while 160/179  
233 (89.4%) Delta cases had residence information across 67 buildings (Figure S1). Of all  
234 residential buildings with cases of the ancestral strain, the majority (1932/3690, 52.3%) had  
235 only one case detected, higher proportions were observed in buildings with Omicron cases  
236 (2269/3931, 58.6%) and with Delta cases (45/67, 67.2%) (Figure 3). Less than 0.2% (8/3690)  
237 of buildings reporting with ancestral strain cases had more than fifteen cases identified,  
238 which increased to 0.6% for Omicron (22/3931) and 3.0% (2/67) for Delta. The largest 0.2%  
239 of residences with reported ancestral, Omicron and Delta infections contributed to 11.0%  
240 16.4% and 18.8% of the total respective infections.

241

242 The distribution of Omicron and Delta reported cases per residence showed a higher degree  
243 of over-dispersion, (Omicron mean: 2.1 and variance: 7.1; Delta: 2.3 and 18.3) relative to the  
244 ancestral strain cases per residence (mean: 2.3, variance: 4.3). Cases within buildings that had

245 more than fifteen reported Delta or Omicron infections made up 35% (56/160) and 9.1%  
246 (743/8208) of the total Delta and Omicron cases, respectively, during the fifth wave. The  
247 eight ancestral strain infected buildings, with greater than fifteen cases, made up 2.0%  
248 (159/8066) of the total ancestral cases. Overdispersion was also observed with regards to  
249 clusters per building. The number of clusters per building in Omicron (mean: 1.9, variance:  
250 9.8) and Delta (mean: 1.9, variance: 11.6) infected buildings were more over dispersed than  
251 buildings with case clusters of the ancestral strain (mean: 1.8, variance: 1.9) (Figure 3).

252

253 Buildings with reported Omicron infections had lower odds, compared to buildings with  
254 ancestral strain infections, of having more cases (6-20 or >20 cases per building), compared  
255 with the reference (1- 5 cases per building) (OR 0.80, 95% CI [0.65, 0.97],  $p=0.026$ ), while  
256 no difference was observed between buildings with cases of the ancestral strain and those  
257 with the Delta cases (OR 0.76, 95% CI [0.18-2.06],  $p=0.496$ ). There were lower odds of  
258 having more clusters (1 vs 2-5 and >5 per building) in buildings with Omicron cases (OR  
259 0.86, 95% CI [0.78, 0.94],  $p<0.001$ ) or with Delta cases (OR 0.58, 95% CI [0.33, 0.97],  $p<$   
260 0.044), compared to buildings with cases of the ancestral strain.

261

### 262 **3. DISCUSSION**

263 Timely identification of COVID-19 cases is key to a local elimination strategy, allowing  
264 isolation of cases as well as contact tracing and quarantine of close contacts to reduce  
265 transmission. In outbreaks of COVID-19 in cities in mainland China, a complete lockdown  
266 along with repeated universal testing to identify all cases has been used to control outbreaks  
267 most recently with the Omicron variant. In Hong Kong a more targeted approach to case-  
268 finding has included CTNs and RTDs, although we show here that these approaches only  
269 ascertained a small minority of daily infections. In contrast to SARS in 2003, large residential

270 clusters of COVID-19 were rare, and only 0.4% of the residential buildings with COVID-19  
271 cases identified had greater than fifteen cases reported, and the largest number of cases in a  
272 building was 214.

273

274 Rather than identifying residential clusters, we find evidence that the increasing RTD test-  
275 positivity in the fifth wave was linked to increased prevalence of infections in the  
276 community. While a larger number of Delta and Omicron residential case clusters did occur,  
277 impacting in overall CTN case detection ratio between waves, these were outlying events  
278 (13). A small number of outbreaks have been linked to infections spreading through the air  
279 via vertical draining or ventilation stacks (3). Reports of residential case clusters have mostly  
280 come from Asia with the majority in Mainland China and Hong Kong, propagating vertical or  
281 horizontal transmission via fomite or aerosol (2, 3, 14-18). The Delta residential clusters in  
282 Hong Kong remained relatively small, while Omicron typically spread between two to eight  
283 apartments, apart from a large Omicron residential cluster in January 2022, with 280, 95 and  
284 17 residents detected across three blocks at the Kwai Chung Estate (19). One study reported  
285 that near the end of the fourth wave 0.1% of the total local cases were due to vertical  
286 transmission in high-rise buildings (14), while other researchers estimated it had reached  
287 0.9% by the end of the Omicron-dominated fifth wave (20).

288

289 The overdispersed nature of Omicron and Delta infection in residence relative to the ancestral  
290 strain may be influenced by a number of factors. The higher transmissibility and shortened  
291 generation time of Delta and Omicron may contribute to the larger residential outbreaks (19,  
292 20). The faster speed of transmission also hampers timely isolation and contact tracing.

293

294 One previous analysis of RTDs found an increased test-positivity in the fifth wave compared  
295 to the fourth wave which was attributed to an estimated higher proportion of vertical  
296 transmission from Omicron cases (20). However, our findings indicate that the higher RTD  
297 test-positivity in the fifth wave is likely to be a reflection of the higher community prevalence  
298 of infection in the substantially larger epidemic wave that occurred. It corresponds with the  
299 established use of test-positivity rates as an indicator assessing epidemic dynamics (21-23).

300

301 There are several limitations to our analyses. First, timely isolation of cases and quarantine of  
302 close contacts identified from building-wide CTNs might have limited the potential  
303 residential clusters which would have been more frequent were it not for the infection control  
304 measures. However, in the fifth wave as reported cases overwhelmed the capacity of the  
305 isolation facilities, infected residents were permitted to be isolated at home. Despite this we  
306 did not observe an increase of residential case clusters during the fifth wave. Second,  
307 undetected infections would bias the estimates of residential case counts, especially as larger  
308 clusters may be more likely to be detected. The higher proportion of asymptomatic cases in  
309 the fifth wave due to vaccination or the less virulent Omicron variant (24, 25) might result in  
310 a higher proportion of small clusters or singular cases remaining undetected during the fifth  
311 wave further exaggerating our current findings. Finally, the Governments resources were  
312 substantially stretched by the large number of cases confirmed in the fifth wave, likely  
313 leading to limited contact tracing and an increased missing case information such as  
314 residential address. To diminish this impact, we limited our analysis to the period prior to the  
315 growth phase of the epidemic wave. Our findings still remain valid given the higher intrinsic  
316 transmissibility of Omicron (26) although the restricted contact-tracing possibly  
317 overestimated the proportion of ‘untraced’ cases in wave 5 extenuating the difference  
318 between Omicron and the ancestral strain.

319 **4. CONCLUSION**

320 In conclusion, the dynamic ratio of the cost and benefits should be considered while  
321 implementing building-wide CTNs and lockdowns in response to the COVID-19 pandemic.  
322 Control measures without substantial benefits may degrade public trust in the public health  
323 system with further downstream consequences including increasing vaccine hesitancy (27).  
324 Despite relative inefficiency, CTNs can be an essential control method when attempting to  
325 maintain local elimination ('zero covid'), most impactful early in an epidemic when the  
326 benefit remains of stemming a new wave. However, residential CTNs and RTDs appear to be  
327 an expensive method of finding small numbers of infections during periods of sustained  
328 community transmission, therefore only make at most a limited contribution to mitigating  
329 local spread of infection.  
330

331 **5. AUTHOR CONTRIBUTIONS**

332 BJC, PW and BRY conceived the study. BRY, FH and HG collected the data and conducted  
333 the analysis. BRY and BJC drafted the manuscript. All authors critically reviewed and  
334 revised the manuscript and approved the final version.

335

336 **6. DATA AVAILABILITY STATEMENT**

337 Data of COVID-19 cases were extracted from the eSARS data provided by the Centre for  
338 Health Protection, Department of Health of Hong Kong SAR. Restrictions apply to the  
339 availability of these data, which were used under license for this study. CTN data were  
340 extracted from an open-access website managed by Hong Kong Government,  
341 (<https://www.chp.gov.hk/en/features/105294.html?page=1>).

342

343 **7. ACKNOWLEDGMENTS**

344 We would like to acknowledge and thank the Centre for Health Protection for the effort in  
345 collecting and providing the necessary data to complete this analysis.

346

347 **8. FUNDING SOURCES**

348 This project was supported by the Health and Medical Research Fund, Health Bureau,  
349 Government of the Hong Kong Special Administration Region, the Collaborative Research  
350 Scheme (Project No. C7123-20G) of the Research Grants Council of the Hong Kong SAR  
351 Government.

352

353 **9. COMPETING INTERESTS**

354 BJC consults for AstraZeneca, Fosun Pharma, GlaxoSmithKline, Haleon, Moderna, Pfizer,  
355 Roche, and Sanofi Pasteur. There are no other competing interests.

356 **10. REFERENCES**

- 357 1. Census, Department S. 2016 population by-census. Census and Statistics Department  
358 Hong Kong; 2016.
- 359 2. Kang M, Wei J, Yuan J, Guo J, Zhang Y, Hang J, et al. Probable Evidence of Fecal  
360 Aerosol Transmission of SARS-CoV-2 in a High-Rise Building. *Ann Intern Med.* 2020 Dec  
361 15;173(12):974-80.
- 362 3. Wang Q, Lin Z, Niu J, Choi GK, Fung JCH, Lau AKH, et al. Spread of SARS-CoV-2  
363 aerosols via two connected drainage stacks in a high-rise housing outbreak of COVID-19. *J*  
364 *Hazard Mater.* 2022 May 15;430:128475.
- 365 4. Huang J, Jones P, Zhang A, Hou SS, Hang J, Spengler JD. Outdoor Airborne  
366 Transmission of Coronavirus Among Apartments in High-Density Cities. *Frontiers in Built*  
367 *Environment.* 2021;7:48.
- 368 5. Martin-Sanchez M, Lim WW, Yeung A, Adam DC, Ali ST, Lau EHY, et al. COVID-  
369 19 transmission in Hong Kong despite universal masking. *J Infect.* 2021 Apr 22.
- 370 6. Yu IT, Li Y, Wong TW, Tam W, Chan AT, Lee JH, et al. Evidence of airborne  
371 transmission of the severe acute respiratory syndrome virus. *N Engl J Med.* 2004 Apr  
372 22;350(17):1731-9.
- 373 7. Mesfin Y, Chen D, Bond H, Lam V, Cheung J, Wong J, et al. Epidemiology of  
374 infections with SARS-CoV-2 Omicron BA. 2 variant in Hong Kong, January-March 2022.  
375 medRxiv. 2022.
- 376 8. Ji S, Xiao S, Wang H, Lei H. Increasing contributions of airborne route in SARS-  
377 CoV-2 omicron variant transmission compared with the ancestral strain. *Build Environ.* 2022  
378 Aug 1;221:109328.



- 379 9. Mefsin YM, Chen D, Bond HS, Lin Y, Cheung JK, Wong JY, et al. Epidemiology of  
380 Infections with SARS-CoV-2 Omicron BA.2 Variant, Hong Kong, January-March 2022.  
381 Emerg Infect Dis. 2022 Sep;28(9):1856-8.
- 382 10. The Government of the Hong Kong Special Administrative Region. Government  
383 extends period of operation under "restriction-testing declaration" and compulsory testing  
384 notice at Ying Kwai House in Kwai Chung Estate. 2022 [cited 06/07/2022]; Available from:  
385 <https://www.info.gov.hk/gia/general/202201/26/P2022012600766.htm>
- 386 11. Gershon S. Coronavirus in Hong Kong: lack of clarity on quarantine puts undue stress  
387 on families and children. Letters 2021 [cited 2022; Hong Kong needs clear guidelines on  
388 who is likely to be quarantined and consideration of methods other than 21 days in a  
389 quarantine centre]. Available from:  
390 [https://sc.mp/c8ld?utm\\_source=copy\\_link&utm\\_medium=share\\_widget&utm\\_campaign=31](https://sc.mp/c8ld?utm_source=copy_link&utm_medium=share_widget&utm_campaign=3132170)  
391 [32170](https://sc.mp/c8ld?utm_source=copy_link&utm_medium=share_widget&utm_campaign=3132170)
- 392 12. Gu H, Xie R, Adam DC, Tsui JL, Chu DK, Chang LDJ, et al. Genomic epidemiology  
393 of SARS-CoV-2 under an elimination strategy in Hong Kong. Nat Commun. 2022 Feb  
394 8;13(1):736.
- 395 13. Eykelbosh A. Contextualizing the risks of indirect COVID-19 transmission in multi-  
396 unit residential buildings. Vancouver, BC: National Collaborating Centre for Environmental  
397 Health. 2021.
- 398 14. Wang Q, Li Y, Lung DC, Chan PT, Dung CH, Jia W, et al. Aerosol transmission of  
399 SARS-CoV-2 due to the chimney effect in two high-rise housing drainage stacks. J Hazard  
400 Mater. 2022 Jan 5;421:126799.
- 401 15. Hwang SE, Chang JH, Oh B, Heo J. Possible aerosol transmission of COVID-19  
402 associated with an outbreak in an apartment in Seoul, South Korea, 2020. Int J Infect Dis.  
403 2021 Mar;104:73-6.

- 404 16. Cheung E., Ting V., G. C. Hong Kong fourth wave: evacuation ordered at fifth  
405 housing block as vertical coronavirus transmission feared. South China Morning Post. 2021.
- 406 17. The Government of the Hong Kong Special Administrative Region. Latest progress in  
407 follow up on novel coronavirus infection in Hong Mei House, Cheung Hong Estate; 2020.
- 408 18. Han T, Park H, Jeong Y, Lee J, Shon E, Park MS, et al. COVID-19 Cluster Linked to  
409 Aerosol Transmission of SARS-CoV-2 via Floor Drains. J Infect Dis. 2022 May  
410 4;225(9):1554-60.
- 411 19. Cheng VC, Ip JD, Chu AW, Tam AR, Chan WM, Abdullah SMU, et al. Rapid spread  
412 of SARS-CoV-2 Omicron subvariant BA.2 in a single-source community outbreak. Clin  
413 Infect Dis. 2022 Mar 10.
- 414 20. Chi-Chung Cheng V, Wong SC, Ka-Wing Au A, Zhang C, Hon-Kwan Chen J, Yung-  
415 Chun So S, et al. Explosive outbreak of SARS-CoV-2 Omicron variant is associated with  
416 vertical transmission in high-rise residential buildings in Hong Kong. Building and  
417 Environment,. 2022;221(109323).
- 418 21. Furuse Y, Ko YK, Ninomiya K, Suzuki M, Oshitani H. Relationship of Test Positivity  
419 Rates with COVID-19 Epidemic Dynamics. Int J Environ Res Public Health. 2021 Apr  
420 27;18(9).
- 421 22. Chiu WA, Ndeffo-Mbah ML. Using test positivity and reported case rates to estimate  
422 state-level COVID-19 prevalence and seroprevalence in the United States. PLoS  
423 computational biology. 2021;17(9):e1009374.
- 424 23. Fasina FO, Salami MA, Fasina MM, Otekunrin OA, Hoogesteijn AL, Hittner JB. Test  
425 positivity - Evaluation of a new metric to assess epidemic dispersal mediated by non-  
426 symptomatic cases. Methods. 2021 Nov;195:15-22.

- 427 24. Butt AA, Dargham SR, Loka S, Shaik RM, Chemaitelly H, Tang P, et al. COVID-19  
428 Disease Severity in Children Infected with the Omicron Variant. *Clin Infect Dis*. 2022 Apr  
429 11.
- 430 25. Wolter N, Jassat W, Walaza S, Welch R, Moultrie H, Groome M, et al. Early  
431 assessment of the clinical severity of the SARS-CoV-2 omicron variant in South Africa: a  
432 data linkage study. *Lancet*. 2022 Jan 29;399(10323):437-46.
- 433 26. Fan Y, Li X, Zhang L, Wan S, Zhang L, Zhou F. SARS-CoV-2 Omicron variant:  
434 recent progress and future perspectives. *Signal Transduct Target Ther*. 2022 Apr 28;7(1):141.
- 435 27. Xiao J, Cheung JK, Wu P, Ni MY, Cowling BJ, Liao Q. Temporal changes in factors  
436 associated with COVID-19 vaccine hesitancy and uptake among adults in Hong Kong: Serial  
437 cross-sectional surveys. *Lancet Reg Health West Pac*. 2022 Jun;23:100441.
- 438

439 **11. FIGURE LEGENDS**

440 Figure 1. Panel A: the daily local cases (logarithmic scale) across the end of the fourth wave  
441 (9 December 2020 – 23 April 2021) and the rising phase of the fifth wave (1 January 2022 –  
442 15 February 2022), during the period that the restriction testing declarations were mandated.  
443 Panel B: The daily cases associated with restriction testing declarations. Panel C: The daily  
444 number of individuals tested within each lockdown. Panel D: the daily test-positivity is  
445 shown, representing the number of cases identified out of the residents tested in RTDs. Panel  
446 E and F show the cases associated with building-wide compulsory testing notices and the  
447 daily number of buildings with a mandated test, respectively.

448

449 Figure 2. (A) The positive association between the daily test-positivity during restriction  
450 testing declarations (RTDs) (lockdown-associated cases/residents tested per lockdown) and  
451 the daily number of local COVID-19 cases identified in Hong Kong. (B) The relationship  
452 between the daily detection of compulsory testing notice (CTN)-associated cases per  
453 building-wide mandated tests, daily local cases, and building-wide mandated tests performed  
454 under CTNs. (C) The relationship between the percentage of local cases associated with an  
455 RTD and the daily local cases, and (D) The relationship between the daily percentage of local  
456 cases associated with a CTN and the daily local cases.

457

458 Figure 3. Distribution of COVID-19 cases and clusters identified per residential building in  
459 Hong Kong during waves one to four (23 January 2020 - 25 April 2021) and wave five (15  
460 December 2021 – 15 February 2022), by type of SARS-CoV-2.

461

462 Table 1. Number of compulsory testing notice (CTN) associated cases, by wave and virus  
 463 variant as well as the number of buildings targeted in the CTNs for the study periods of  
 464 interest including wave four (9 December 2020 – 23 April 2021) and the early period of wave  
 465 five (15 December 2021- 15 February 2, 2022)

|                                                                    | Wave 4      |           | Wave 5          |         |
|--------------------------------------------------------------------|-------------|-----------|-----------------|---------|
|                                                                    | ancestral   | Delta     | Omicron         | p-value |
| Cases with valid residence, n                                      | 3426        | 160       | 8208            | -       |
| Cases associated with CTNs, n (%)                                  | 345 (10.1)  | 87 (5.4)  | 1708 (20.8)     | <0.001  |
| Asymptomatic cases, n (%)                                          | 108 (31.8)  | 23 (26.4) | 401 (23.5)      | 0.0158  |
| Untraceable cases, n (%)                                           | 139 (39.8)  | 68 (78.2) | 1373 (80.4)     | <0.001  |
| Buildings targeted in CTNs, n                                      | 1207        |           | 1097            | -       |
| Building-wide mandated tests, n                                    | 1207        |           | 4174            | -       |
| Median tests per building (interquartile range)                    | 1 (1,1)     |           | 4 (1, 6)        | -       |
| Range                                                              | 1-1         |           | 1-15            | -       |
| Justifications                                                     |             |           |                 |         |
| Confirmed case(s) in the building                                  | 661         |           | 3801            |         |
| Positive sewage samples                                            | 232         |           | 179             |         |
| Restriction testing declaration                                    | 305         |           | 163             |         |
| Combined                                                           | 9           |           | 31              |         |
| Cases per 100 buildings targeted <sup>1</sup> (95% CI)             | 29 (26, 32) |           | 172 (164, 180)* | <0.001  |
| Cases per 100 building-wide mandated tests <sup>2</sup> (95% CI)   | 29 (26, 32) |           | 45 (43, 47)*    | <0.001  |
| Untraceable <sup>3</sup> cases per 100 buildings targeted (95% CI) | 12 (10, 41) |           | 98 (93, 103)    | <0.001  |
| Untraceable cases per 100 building-wide mandated tests (95% CI)    | 12 (10, 41) |           | 36 (35, 38)     | <0.001  |

<sup>1</sup>Cases per 100 buildings targeted = total number of cases associated with CTNs/buildings targeted x 100

<sup>2</sup>Cases per 100 building-wide mandated tested = total number of cases associated with CTNs /building-wide mandated tests x 100

<sup>3</sup>Cases were considered untraceable if (1) they were non-clustered and reported by the CHP after the compulsory testing order, for clustered cases (2) only associated with one cluster, (3) in a cluster where all cases were reported after the CTN issuance, or (4) in a cluster where no cases were linked to a separate cluster (prior or subsequent) with any cases reported before the earliest report date of the cluster in question.

\*Including 93 cases associated with CTNs wherein the infecting virus variant was undefined

466

(A) Daily local cases

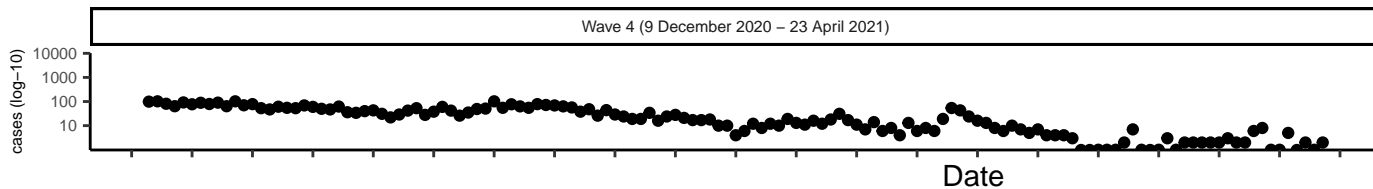

Wave 5 (1 January 2022 – 15 February 2022)

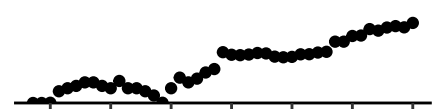

(B) RTD-associated cases

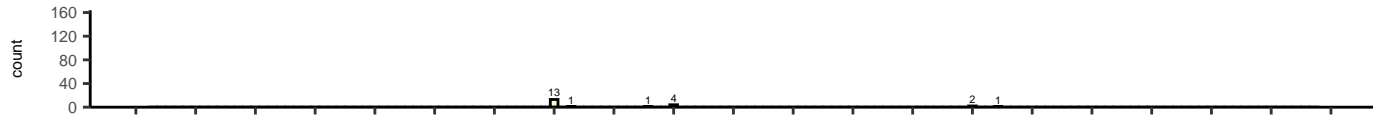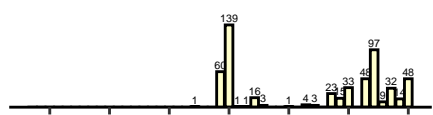

(C) Residents tested in RTDs

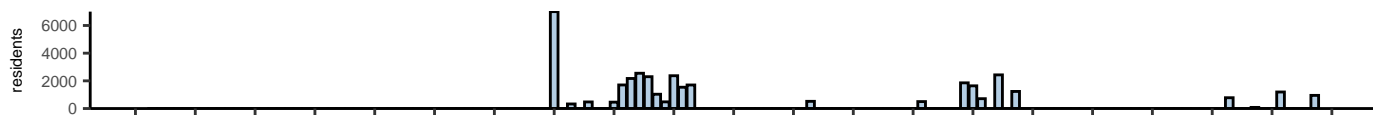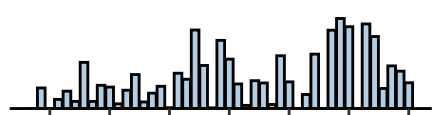

(D) RTD test positivity

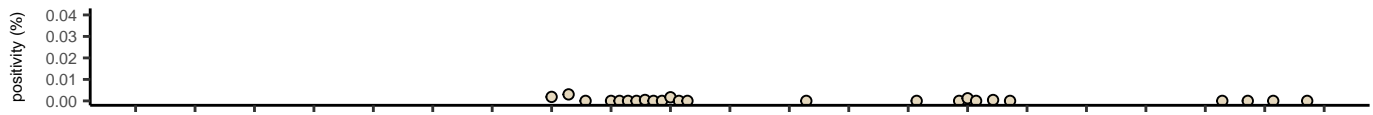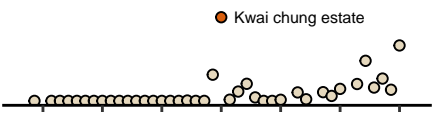

(E) CTN-associated cases

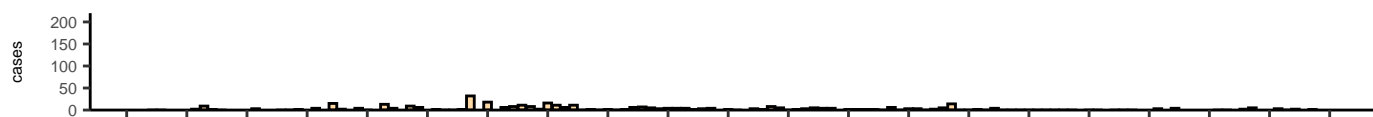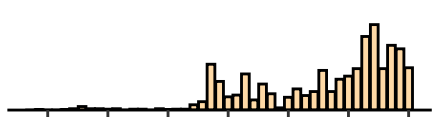

(F) Building-wide tests in CTNs

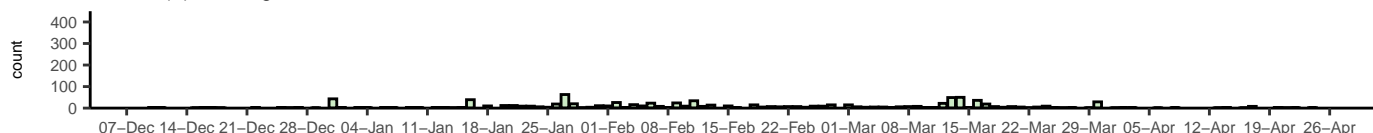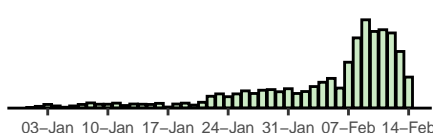

07-Dec 14-Dec 21-Dec 28-Dec 04-Jan 11-Jan 18-Jan 25-Jan 01-Feb 08-Feb 15-Feb 22-Feb 01-Mar 08-Mar 15-Mar 22-Mar 29-Mar 05-Apr 12-Apr 19-Apr 26-Apr

2021

03-Jan 10-Jan 17-Jan 24-Jan 31-Jan 07-Feb 14-Feb

2022

Date

(A) Daily RTD test-positivity and local cases

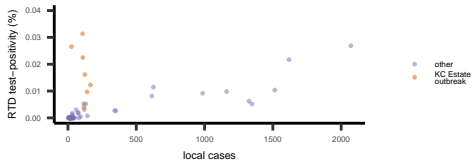

(B) Daily CTN-associated cases, building-wide tests and local cases

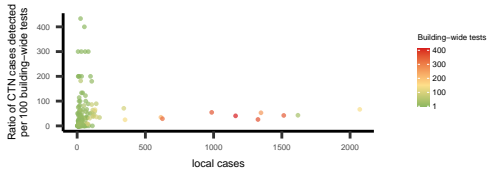

(C) Daily RTD-associated cases and local cases

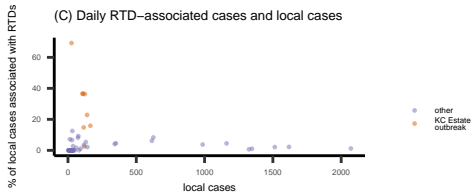

(D) Daily CTN-associated cases and local cases

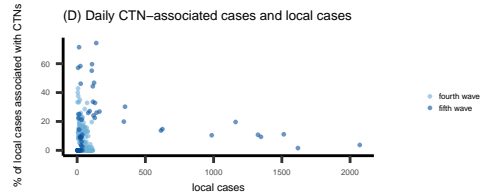

# Waves 1-4 (Ancestral strain)

medRxiv preprint doi: <https://doi.org/10.1101/2022.10.12.22280904>; this version posted October 13, 2022. The copyright holder for this preprint (which was not certified by peer review) is the author/funder, who has granted medRxiv a license to display the preprint in perpetuity. It is made available under a [CC-BY-NC-ND 4.0 International license](https://creativecommons.org/licenses/by-nc-nd/4.0/).

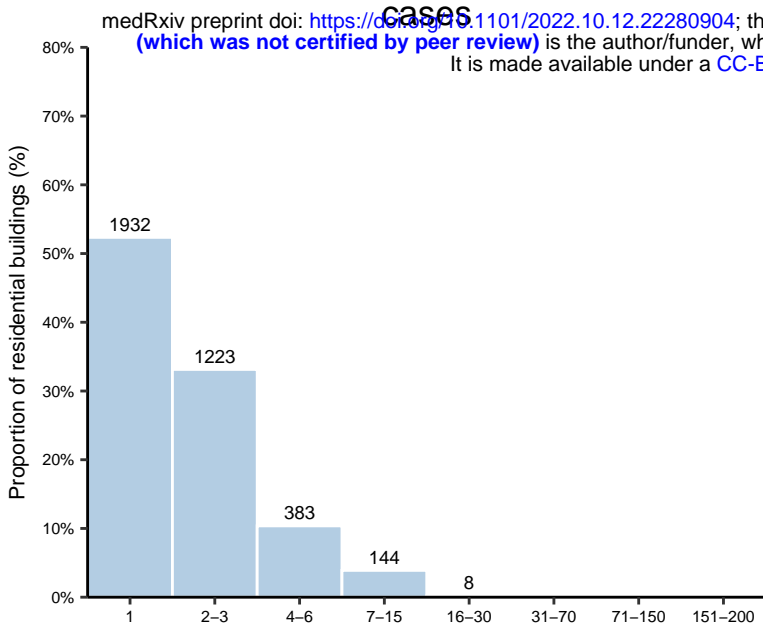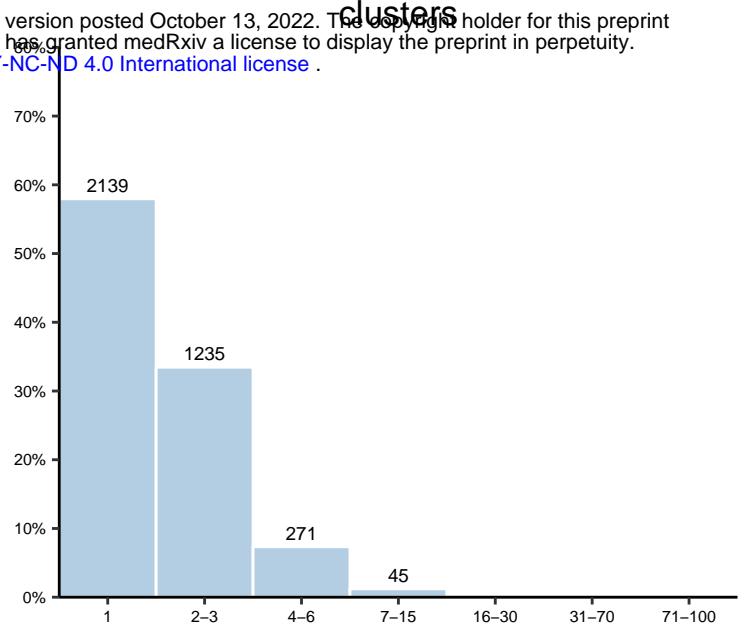

# Wave 5 (Omicron)

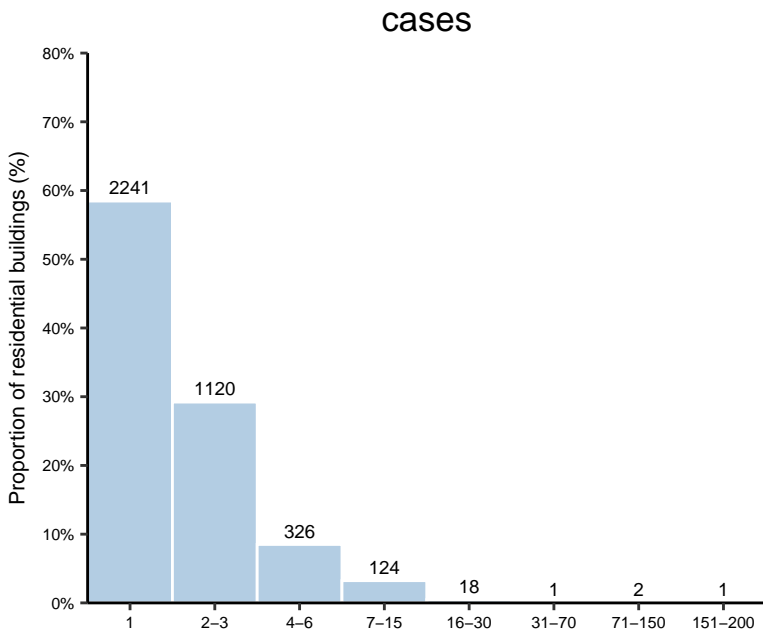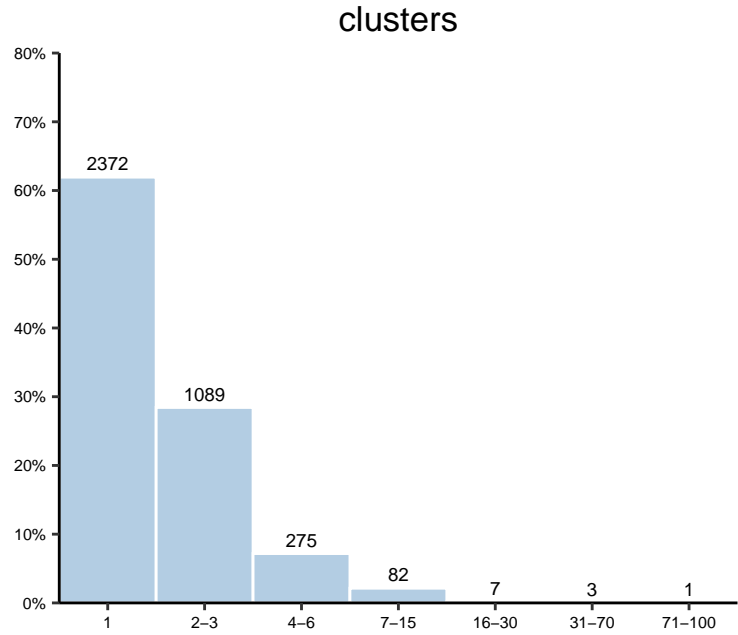

# Wave 5 (Delta)

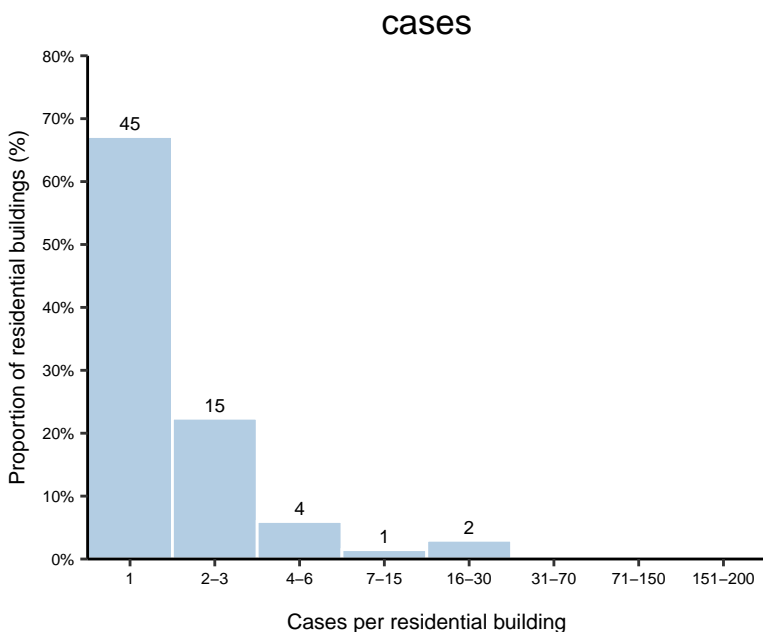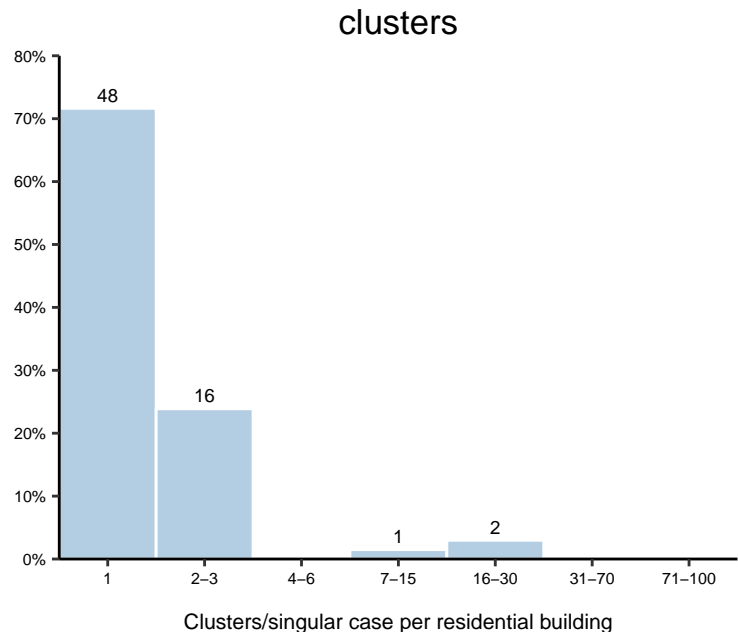

Cases per residential building

Clusters/singular case per residential building
